# Supplementary material
Source: PubMed Central journal article supplement (PMC5588880)
Supplement: NIHMS898686-supplement-Supplementary_file.pdf [file NIHMS898686-supplement-Supplementary_file.pdf]

**Table S1.** *ERMAP* primers

| Name     | Sequence (5'→3')         | Orientation | Use              |                            |            |
|----------|--------------------------|-------------|------------------|----------------------------|------------|
|          |                          |             | Primary amplicon | Nested PCR allele-specific | Sequencing |
| ScF3     | GTGCTCCATGAGTCAAGCGATTAC | Sense       | Yes              | No                         | Yes        |
| SCSEQ_1  | CCGCCTGTCTTGCTTTCATA     | Anti-sense  | No               | No                         | Yes        |
| SCSEQ_2  | TTCTCGCTGTCCCTGTAAA      | Anti-sense  | No               | No                         | Yes        |
| SCSEQ_3  | CAGGGTGTAGCTGGAGATAAAG   | Sense       | No               | No                         | Yes        |
| SCSEQ_4  | CCATCACCAAGGATAGCAGATAA  | Anti-sense  | No               | No                         | Yes        |
| SCSEQ_5  | CAGAGCAAGACCCTGTCTTAAA   | Anti-sense  | No               | No                         | Yes        |
| SCSEQ_6  | GCAAATGACCACCACACTTAC    | Anti-sense  | No               | No                         | Yes        |
| SCSEQ_7  | TGCACCAGATGCTGGAAATAA    | Anti-sense  | No               | No                         | Yes        |
| SCSEQ_8  | GGTACCCTGAAGTGTGTATGAT   | Sense       | No               | No                         | Yes        |
| SCSEQ_9  | GGAGACTGGGAAACTGAAGATG   | Anti-sense  | No               | No                         | Yes        |
| SCSEQ_10 | GTCCTAGGAAGGTTGCATAAC    | Anti-sense  | No               | No                         | Yes        |
| SCSEQ_11 | CAATCCCAGCTCTGCTACTTAC   | Anti-sense  | No               | No                         | Yes        |
| SCSEQ_12 | GGAAGGGATGAGGAAGAGGATA   | Anti-sense  | No               | No                         | Yes        |
| SCSEQ_13 | AATGGACATGGCTGGGTAAG     | Anti-sense  | No               | No                         | Yes        |
| SCSEQ_14 | TGCCCAAGAGGGAAGTGTCT     | Sense       | No               | No                         | Yes        |
| SCSEQ_15 | CCCAAACCATGTCTTTGCATT    | Sense       | No               | No                         | Yes        |
| SCSEQ_16 | GTTGTGGTGTAGCCCAGATAG    | Anti-sense  | No               | No                         | Yes        |
| SCSEQ_17 | CTTGTCTCTCTCCACTCTCT     | Anti-sense  | No               | No                         | Yes        |
| SCSEQ_18 | CCTCCCGAGTAGCTGGATTA     | Sense       | No               | No                         | Yes        |
| SCSEQ_19 | AGGACCATAACCCTGGCAGAG    | Sense       | No               | No                         | Yes        |
| SCSEQ_20 | CTTTGCCCATGTCCCTAAGTAA   | Sense       | No               | No                         | Yes        |
| SCSEQ_21 | CGGCTACTTAGGAGACTGAATG   | Sense       | No               | No                         | Yes        |
| SCSEQ_22 | AGGACCATCCAAACCATTC      | Sense       | No               | No                         | Yes        |
| SCSEQ_23 | TTAGACATCTCCCTGAGGT      | Sense       | No               | No                         | Yes        |
| SCSEQ_24 | TCCAACACTCCTGCCCTTAT     | Sense       | No               | No                         | Yes        |
| SCSEQ_25 | GGAGTCGAGTAGCTTGAACAT    | Sense       | No               | No                         | Yes        |
| SCSEQ_26 | GCAGTGGTAAAGCAAGGAATG    | Sense       | No               | No                         | Yes        |
| SCSEQ_27 | GGAAAGGCTAATGAAGGGAGTT   | Anti-sense  | No               | No                         | Yes        |
| SCSEQ_28 | GGAGGTGGAGGTGAAGATAGA    | Sense       | No               | No                         | Yes        |
| SCSEQ_29 | GTCAGTGACACCTCAGATCATT   | Sense       | No               | No                         | Yes        |
| SCSEQ_30 | GAGAGGATTCAGTGCTACTTC    | Sense       | No               | No                         | Yes        |
| SCSEQ_31 | GCCGACAGCAGAAATGAAAC     | Sense       | No               | No                         | Yes        |
| SCSEQ_32 | ACGTTTCACCAGGAAGAGATAG   | Sense       | No               | No                         | Yes        |
| SCSEQ_33 | GTGAGCCGAGATTGCACTATT    | Sense       | No               | No                         | Yes        |
| SCSEQ_34 | CTTCCGTACCAACTTATCTCCTG  | Sense       | No               | No                         | Yes        |
| SCSEQ_35 | GTGACTTGTCTGTTCTGTTCTA   | Sense       | No               | No                         | Yes        |
| SCSEQ_36 | CCTTCAGGCAGAGTACAACAA    | Sense       | No               | No                         | Yes        |
| SCSEQ_37 | GTTTCATCAAGTCTGCACAATAGC | Sense       | No               | No                         | Yes        |
| SCSEQ_38 | ACTTCCCACTAAGCCCTACCT    | Sense       | No               | No                         | Yes        |
| SCSEQ_39 | GCAGTGGCAGTGACCCTGGAC    | Sense       | No               | No                         | Yes        |
| SCSEQ_40 | GGAGGAAGTGCTCTGAGATATG   | Anti-sense  | No               | No                         | Yes        |
| SCSEQ_41 | CCAGTCCCTGACTTCTTACTTATC | Sense       | No               | No                         | Yes        |

|          |                            |            |     |     |     |
|----------|----------------------------|------------|-----|-----|-----|
| SCSEQ_42 | CTAGCTGGACCTCTCTGAATCT     | Anti-sense | No  | No  | Yes |
| SCSEQ_43 | CTGCTCACTGACTCACTACATAC    | Anti-sense | No  | No  | Yes |
| SCSEQ_44 | GAGATAGGGCCTTGCTCT         | Sense      | No  | No  | Yes |
| SCSEQ_45 | GAGACAGAGTCTCGCTCCGT       | Anti-sense | No  | No  | Yes |
| SCSEQ_46 | GAGACAGAGTTTCACTCTGC       | Anti-sense | No  | No  | Yes |
| ScR3     | TACCTTCCCACAACCTCCTCATTC   | Anti-sense | Yes | No  | Yes |
| SCAS_1   | GGGCGGATCACAAGGTCA         | Sense      | No  | Yes | No  |
| SCAS_2   | GGGCGGATCACAAGGTCG         | Sense      | No  | Yes | No  |
| SCAS_3   | CCAAATGTGGGCGGGCCTT        | Anti-sense | No  | Yes | No  |
| SCAS_4   | CCAAATGTGGGCGGGCCTC        | Anti-sense | No  | Yes | No  |
| SCAS_5   | ACCAAAACACAAATACCAAACCTTC  | Anti-sense | No  | Yes | No  |
| SCAS_6   | ACCAAAACACAAATACCAAACCTTTT | Anti-sense | No  | Yes | No  |
| SCAS_7   | AATGCACATAATGTAGCACTTGGTG  | Sense      | No  | Yes | No  |
| SCAS_8   | AATGCACATAATGTAGCACTTGGTA  | Sense      | No  | Yes | No  |
| SCAS_9   | GGTGTTAGCTTTGGTGAACCTT     | Sense      | No  | Yes | No  |
| SCAS_10  | GGTGTTAGCTTTGGTGAACCTC     | Sense      | No  | Yes | No  |

**Table S2.** Genetic variations detected in the *ERMAP* gene

| Location    | Nucleotide Change * | dbSNP reference no. | Protein residue change † | Donor observations (N=50) |              |       | HWE <i>p</i> value | Global VAF‡ | Observed in the present study | Position in Table 1 and Table S4 |
|-------------|---------------------|---------------------|--------------------------|---------------------------|--------------|-------|--------------------|-------------|-------------------------------|----------------------------------|
|             |                     |                     |                          | Homozygous                | Heterozygous | VAF   |                    |             |                               |                                  |
| Intron 1    | -121-1490A>G        | rs7538928           | NA                       | 1                         | 10           | 0.12  | 0.707              | 0.131       | Yes                           | 1                                |
|             | -121-1257T>C        | rs12126596          | NA                       | 10                        | 22           | 0.42  | 0.493              | 0.382       | Yes                           | 2                                |
|             | -121-795T>C         | rs6600425           | NA                       | 50                        | 0            | 1.00  | NA                 | 0.989       | No                            | NA                               |
|             | -121-522T>C         | rs6691307           | NA                       | 0                         | 2            | 0.02  | 0.885              | 0.020       | Yes                           | 3                                |
| Intron 2    | -121-452G>A         | Novel               | NA                       | 0                         | 1            | 0.01  | 0.943              | NA          | Yes                           | 4                                |
|             | -6+634G>T           | Novel               | NA                       | 0                         | 1            | 0.01  | 0.943              | NA          | Yes                           | 5                                |
|             | -6+798C>T           | rs190962346         | NA                       | 0                         | 1            | 0.01  | 0.943              | 0.002       | Yes                           | 6                                |
|             | -6+1397G>A          | rs6658001           | NA                       | 5                         | 19           | 0.29  | 0.585              | 0.286       | Yes                           | 7                                |
|             | -6+1466C>T          | Novel               | NA                       | 0                         | 1            | 0.01  | 0.943              | NA          | Yes                           | 8                                |
|             | -6+1835C>A          | rs1471747           | NA                       | 50                        | 0            | 1.00  | NA                 | 0.989       | No                            | NA                               |
|             | -6+1993C>T          | rs183580459         | NA                       | 0                         | 1            | 0.01  | 0.943              | 0.001       | Yes                           | 9                                |
|             | -6+2239A>G          | rs35531445          | NA                       | 0                         | 1            | 0.01  | 0.943              | 0.029       | Yes                           | 10                               |
|             | -5-1676G>A          | rs35245962          | NA                       | 1                         | 11           | 0.13  | 0.846              | 0.132       | Yes                           | 11                               |
|             | -5-1479G>A          | rs114193579         | NA                       | 0                         | 2            | 0.02  | 0.885              | 0.008       | Yes                           | 12                               |
|             | -5-1374C>G          | rs6703396           | NA                       | 0                         | 2            | 0.02  | 0.885              | 0.017       | Yes                           | 13                               |
|             | -5-1072C>T          | rs529383471         | NA                       | 0                         | 1            | 0.01  | 0.943              | 0.001       | Yes                           | 14                               |
|             | -5-477G>C           | rs551984772         | NA                       | 0                         | 1            | 0.01  | 0.943              | 0.001       | Yes                           | 15                               |
|             | -5-297C>T           | rs35568889          | NA                       | 0                         | 1            | 0.01  | 0.943              | 0.010       | Yes                           | 16                               |
|             | Exon 3              | -3C>T               | rs543001910              | NA                        | 0            | 1     | 0.01               | 0.943       | 0.000                         | Yes                              |
| -2G>A       |                     | rs12124733          | NA                       | 7                         | 28           | 0.42  | 0.290              | 0.335       | Yes                           | 18                               |
| 11C>T       |                     | rs35757049          | Ala4Val                  | 0                         | 2            | 0.02  | 0.885              | 0.017       | Yes                           | 19                               |
| 54C>T       |                     | rs33950227          | Leu18Leu                 | 1                         | 11           | 0.13  | 0.846              | 0.146       | Yes                           | 20                               |
| 76C>T       |                     | rs33953680          | His26Tyr                 | 2                         | 11           | 0.15  | 0.331              | 0.142       | Yes                           | 21                               |
| Intron 3    | 86-85G>T            | rs12727498          | NA                       | 4                         | 19           | 0.27  | 0.798              | NA          | Yes                           | 22                               |
|             | 86-79G>A            | Novel               | NA                       | 0                         | 1            | 0.01  | 0.943              | NA          | Yes                           | 23                               |
|             | 86-60C>A            | rs138466210         | NA                       | 0                         | 1            | 0.01  | 0.943              | 0.000       | Yes                           | 24                               |
| Exon 4      | 103G>A              | rs146429994         | Gly35 Ser                | 0                         | 0            | 0.00  | NA                 | 0.002       | No                            | NA                               |
|             | 139G>A              | rs56047316          | Glu47Lys                 | 0                         | 0            | 0.00  | NA                 | 0.001       | No                            | NA                               |
|             | 169G>A              | rs56025238          | Gly57Arg                 | 0                         | 0            | 0.00  | NA                 | 0.001       | No                            | NA                               |
|             | 178C>G              | rs56136737          | Pro60Ala                 | 0                         | 0            | 0.00  | NA                 | NA          | No                            | NA                               |
|             | 242G>A              | rs368064875         | Arg81Gln                 | 0                         | 0            | 0.00  | NA                 | NA          | No                            | NA                               |
|             | 307_308delGA        | rs387906265         | Asp103Cysfs              | 0                         | 0            | 0.00  | NA                 | NA          | No                            | NA                               |
| Intron 4    | 433+296T>G          | rs17386017          | NA                       | 2                         | 11           | 0.15  | 0.331              | 0.158       | Yes                           | 25                               |
|             | 433+436T>G          | rs115186448         | NA                       | 0                         | 9            | 0.09  | 0.484              | 0.03        | Yes                           | 26                               |
|             | 433+792A>T          | rs12123271          | NA                       | 6                         | 18           | 0.30  | 0.312              | 0.266       | Yes                           | 27                               |
|             | 433+1097A>G         | rs12028144          | NA                       | 2                         | 10           | 0.14  | 0.230              | 0.158       | Yes                           | 28                               |
|             | 433+1162G>A         | rs34052572          | NA                       | 0                         | 4            | 0.04  | 0.768              | 0.007       | Yes                           | 29                               |
|             | 433+1225C>T         | rs191545157         | NA                       | 0                         | 1            | 0.01  | 0.943              | 0.002       | Yes                           | 30                               |
|             | 433+1239A>G         | rs11210725          | NA                       | 50                        | 0            | 1.00  | NA                 | 0.989       | No                            | NA                               |
|             | 433+1281T>C         | rs11580112          | NA                       | 6                         | 29           | 0.41  | 0.159              | 0.445       | Yes                           | 31                               |
|             | 433+1345C>G         | rs34496324          | NA                       | 0                         | 4            | 0.04  | 0.768              | 0.035       | Yes                           | 32                               |
|             | 433+1492T>C         | rs11802698          | NA                       | 0                         | 4            | 0.04  | 0.768              | 0.044       | Yes                           | 33                               |
|             | 433+1548A>G         | rs10789427          | NA                       | 50                        | 0            | 1.00  | NA                 | 0.988       | No                            | NA                               |
|             | 433+1577G>A         | rs35837615          | NA                       | 0                         | 1            | 0.01  | 0.943              | 0.002       | Yes                           | 34                               |
|             | 433+1763A>G         | rs56161641          | NA                       | 17                        | 29           | 0.63  | 0.084              | 0.679       | Yes                           | 35                               |
| 434-1838C>T | rs4660671           | NA                  | 0                        | 12                        | 0.12         | 0.334 | 0.157              | Yes         | 36                            |                                  |

|                  |                 |             |           |    |    |      |       |        |     |    |
|------------------|-----------------|-------------|-----------|----|----|------|-------|--------|-----|----|
|                  | 434-1588A>G     | rs11210726  | NA        | 16 | 28 | 0.60 | 0.238 | 0.662  | Yes | 37 |
|                  | 434-1479T>C     | rs747148476 | NA        | 0  | 1  | 0.01 | 0.943 | NA     | Yes | 38 |
|                  | 434-1474G>A     | rs12073215  | NA        | 0  | 4  | 0.04 | 0.768 | 0.044  | Yes | 39 |
|                  | 434-1409G>A     | rs58724795  | NA        | 0  | 2  | 0.02 | 0.885 | 0.027  | Yes | 40 |
|                  | 434-1173T>C     | rs7540312   | NA        | 4  | 24 | 0.32 | 0.466 | 0.276  | Yes | 41 |
|                  | 434-1061G>A     | rs7548186   | NA        | 44 | 5  | 0.93 | 0.100 | 0.877  | Yes | 42 |
|                  | 434-874T>C      | rs7540604   | NA        | 20 | 24 | 0.64 | 0.768 | 0.660  | Yes | 43 |
|                  | 434-456T>C      | rs35805842  | NA        | 0  | 8  | 0.08 | 0.538 | 0.140  | Yes | 44 |
|                  | 434-46T>C       | rs4660672   | NA        | 16 | 20 | 0.52 | 0.159 | 0.418  | Yes | 45 |
| Intron 5         | 550+96C>G       | rs4660673   | NA        | 22 | 23 | 0.67 | 0.775 | 0.748  | Yes | 46 |
|                  | 551-12T>C       | rs149950197 | NA        | 0  | 1  | 0.01 | 0.943 | 0.018  | Yes | 47 |
| Intron 6         | 583+253C>T      | Novel       | NA        | 0  | 2  | 0.02 | 0.885 | NA     | Yes | 48 |
|                  | 584-314A>T      | rs11581978  | NA        | 1  | 8  | 0.10 | 0.432 | 0.114  | Yes | 49 |
| Intron 7         | 616+110C>G      | rs1466548   | NA        | 17 | 21 | 0.55 | 0.284 | 0.446  | Yes | 50 |
|                  | 616+504G>C      | rs17386162  | NA        | 1  | 8  | 0.10 | 0.432 | 0.114  | Yes | 51 |
|                  | 616+675G>A      | rs11210727  | NA        | 2  | 18 | 0.22 | 0.729 | 0.186  | Yes | 52 |
|                  | 616+719C>T      | rs7522285   | NA        | 47 | 3  | 0.97 | 0.826 | 0.971  | Yes | 53 |
|                  | 617-498C>T      | rs35932223  | NA        | 0  | 3  | 0.03 | 0.826 | 0.012  | Yes | 54 |
|                  | 617-485C>T      | rs35828903  | NA        | 0  | 3  | 0.03 | 0.826 | 0.012  | Yes | 55 |
|                  | 617-398C>A      | rs11210728  | NA        | 50 | 0  | 1.00 | NA    | 0.976  | No  | NA |
|                  | 617-336G>C      | rs34391768  | NA        | 0  | 3  | 0.03 | 0.826 | 0.012  | Yes | 56 |
|                  | 617-204C>A      | rs35761132  | NA        | 1  | 8  | 0.10 | 0.432 | 0.114  | Yes | 57 |
| Intron 8         | c.637+33C>G     | rs34228099  | NA        | 0  | 1  | 0.01 | 0.943 | 0.009  | Yes | 58 |
| Intron 9         | 658+29G>A       | rs12034000  | NA        | 7  | 25 | 0.39 | 0.719 | 0.260  | Yes | 59 |
| Intron 11        | 712+161G>A      | rs11210729  | NA        | 3  | 17 | 0.23 | 0.776 | 0.186  | Yes | 60 |
|                  | 712+250G>A      | rs1466549   | NA        | 50 | 0  | 1.00 | NA    | 0.996  | No  | NA |
|                  | 713-1097G>A     | Novel       | NA        | 0  | 1  | 0.01 | 0.943 | NA     | Yes | 61 |
|                  | 713-606A>G      | rs11210730  | NA        | 50 | 0  | 1.00 | NA    | 0.004  | No  | NA |
|                  | 713-556G>A      | rs12078281  | NA        | 3  | 26 | 0.32 | 0.168 | 0.267  | Yes | 62 |
|                  | 713-364C>G      | rs35303774  | NA        | 0  | 1  | 0.01 | 0.943 | 0.017  | Yes | 63 |
|                  | 713-34C>G       | rs34993626  | NA        | 0  | 3  | 0.03 | 0.826 | 0.018  | Yes | 64 |
| Exon 12          | 888G>A          | rs35972628  | Glu296Glu | 0  | 1  | 0.01 | 0.943 | 0.001  | Yes | 65 |
|                  | 936G>A          | rs140414272 | Glu312Glu | 0  | 1  | 0.01 | 0.943 | 0.000  | Yes | 66 |
|                  | 994C>T          | NA          | Arg332Ter | 0  | 0  | 0.00 | NA    | NA     | No  | NA |
| Exon 12 (3' UTR) | c.*484 *485insT | rs55986603  | NA        | 0  | 0  | 0.00 | NA    | NA     | No  | NA |
|                  | *645G>A         | rs1484324   | NA        | 47 | 3  | 0.97 | 0.826 | 0.0940 | Yes | 67 |
|                  | *939G>C         | rs10789428  | NA        | 50 | 0  | 1.00 | NA    | 0.989  | No  | NA |
|                  | *1122T>C        | rs36098574  | NA        | 0  | 3  | 0.03 | 0.826 | 0.012  | Yes | 68 |
|                  | *1129T>C        | rs148274743 | NA        | 0  | 1  | 0.01 | 0.943 | 0.001  | Yes | 69 |
|                  | *1424A>G        | rs34137903  | NA        | 0  | 3  | 0.03 | 0.826 | 0.012  | Yes | 70 |
|                  | *1526A>G        | rs34423918  | NA        | 0  | 3  | 0.03 | 0.826 | 0.012  | Yes | 71 |
|                  | *1736A>G        | rs12406279  | NA        | 1  | 8  | 0.10 | 0.432 | 0.115  | Yes | 72 |

\* relative to NCBI Reference Sequence NM\_001017922.1

† relative to NCBI Reference Sequence NP\_001017922.1

‡ global VAF from 1000Genome phase 1 genotype data from 1094 worldwide individuals

VAF-variant allele frequency

NA- Not available

**Table S3.** *ERMAP* genotypes observed in the 50 individuals

| Genotype number | Genotype |     |     |     |     |     |     |     |     |     |     |     |     |     |     | Total |
|-----------------|----------|-----|-----|-----|-----|-----|-----|-----|-----|-----|-----|-----|-----|-----|-----|-------|
| 1               | A/A      | T/C | C/C | T/T | G/G | G/G | C/C | G/A | C/C | A/A | C/C | A/A | G/G | G/G | C/C | 2     |
|                 | C/C      | G/G | C/C | C/C | G/A | C/C | C/C | C/C | G/T | G/G | C/C | T/T | T/T | A/T | A/A |       |
|                 | G/G      | C/C | G/G | T/C | C/C | T/T | G/G | G/G | G/A | C/C | G/A | T/T | G/G | G/G | T/C |       |
|                 | A/A      | C/T | T/T | C/T | G/C | T/T | C/C | A/A | G/G | G/G | G/A | T/T | C/C | C/C | A/A |       |
|                 | G/G      | C/C | C/C | G/A | G/A | A/A | G/G | G/G | G/A | C/C | C/C | G/G | G/G | A/A | C/C |       |
| 2               | T/T      | T/T | A/A | A/A | A/A |     |     |     |     |     |     |     |     |     |     | 1     |
|                 | A/A      | C/C | C/C | T/T | G/G | G/G | C/C | G/G | C/C | A/A | C/C | A/A | G/G | G/G | C/C |       |
|                 | C/C      | G/G | C/C | C/C | A/A | C/C | C/C | C/C | G/G | G/G | C/C | A/A | T/T | T/T | A/A |       |
|                 | G/G      | C/C | G/G | T/T | C/C | T/T | G/G | G/G | A/A | C/C | A/A | T/T | G/G | G/G | C/C |       |
|                 | A/A      | T/T | T/T | T/T | C/C | T/T | C/C | A/A | G/C | G/G | G/A | T/T | C/C | C/C | A/A |       |
| 3               | G/G      | C/C | C/C | G/G | G/A | A/A | G/G | G/G | G/G | C/C | C/C | G/G | G/G | A/A | C/C | 1     |
|                 | A/A      | C/C | T/T | C/C | G/G | T/T | C/C | A/A | C/C | G/G | G/G | T/T | C/C | C/C | A/A |       |
|                 | G/G      | C/C | C/C | G/G | G/G | A/A | G/G | G/G | G/G | C/C | C/C | G/G | G/G | A/A | C/C |       |
|                 | T/T      | T/T | A/A | A/A | A/A |     |     |     |     |     |     |     |     |     |     |       |
|                 | A/A      | T/T | C/C | T/T | G/G | G/G | C/C | G/A | C/C | A/A | C/C | A/A | G/G | G/G | C/C |       |
| 4               | C/C      | G/G | C/C | C/C | G/G | C/C | C/C | C/C | G/T | G/G | C/C | T/T | T/T | A/A | A/A | 1     |
|                 | G/G      | C/C | G/G | T/T | C/C | T/T | G/G | G/G | A/A | C/C | A/A | T/T | G/G | G/G | C/C |       |
|                 | A/A      | T/T | T/T | T/T | C/C | T/T | C/C | A/A | G/G | G/G | G/G | T/T | C/C | C/C | A/A |       |
|                 | G/G      | C/C | C/C | A/A | G/G | A/A | G/G | G/G | A/A | C/C | C/C | G/G | G/G | A/A | C/C |       |
|                 | T/T      | T/T | A/A | A/A | A/A |     |     |     |     |     |     |     |     |     |     |       |
| 5               | A/A      | T/C | C/C | T/T | G/A | G/G | C/C | G/A | C/C | A/A | C/C | A/A | G/G | G/G | C/C | 1     |
|                 | C/C      | G/G | C/C | C/C | G/A | C/C | C/C | C/C | G/T | G/G | C/C | T/T | T/T | T/T | A/A |       |
|                 | G/G      | C/C | G/G | T/C | C/C | T/T | G/G | G/G | G/A | C/C | G/A | T/T | G/G | G/G | T/C |       |
|                 | A/A      | C/T | T/T | C/T | G/C | T/C | C/C | A/A | G/G | G/G | G/A | T/T | C/C | C/C | A/A |       |
|                 | G/G      | C/C | C/C | G/A | G/A | A/A | G/G | G/G | G/A | C/C | C/C | G/G | G/G | A/A | C/C |       |
| 6               | T/T      | T/T | A/A | A/A | A/A |     |     |     |     |     |     |     |     |     |     | 1     |
|                 | A/A      | T/C | C/C | T/T | G/G | G/G | C/C | G/A | C/C | A/A | C/C | A/A | G/G | G/G | C/C |       |
|                 | C/C      | G/G | C/C | C/C | G/A | C/C | C/C | C/C | G/T | G/G | C/C | T/T | T/T | A/A | A/A |       |
|                 | G/G      | C/C | G/G | T/C | C/C | T/T | G/G | G/G | G/A | C/C | G/A | T/T | G/G | G/G | T/T |       |
|                 | A/A      | C/C | T/C | C/T | G/G | T/T | C/C | A/A | G/C | G/G | G/A | T/T | C/C | C/C | A/A |       |
| 7               | G/G      | C/C | C/C | G/A | G/A | A/A | G/G | G/G | G/G | C/C | C/C | G/G | G/G | G/A | C/C | 1     |
|                 | T/T      | T/T | A/A | A/A | A/A |     |     |     |     |     |     |     |     |     |     |       |
|                 | A/A      | T/C | C/C | T/T | G/G | G/G | C/C | G/G | C/C | A/A | C/C | A/A | G/G | G/G | C/C |       |
|                 | C/C      | G/G | C/C | C/C | G/A | C/C | C/C | C/C | G/G | G/G | G/G | T/T | T/T | A/T | A/A |       |
|                 | G/G      | C/C | G/G | T/C | C/C | T/T | G/G | G/G | G/A | C/T | G/A | T/T | G/G | G/G | T/C |       |
| 8               | A/A      | C/T | T/T | C/T | G/C | T/T | C/C | A/A | G/C | G/G | G/A | T/T | C/C | C/C | A/A | 1     |
|                 | G/G      | C/C | C/C | G/G | G/A | A/A | G/G | G/G | G/G | C/C | C/C | G/G | G/G | A/A | C/C |       |
|                 | T/T      | T/T | A/A | A/A | A/A |     |     |     |     |     |     |     |     |     |     |       |
|                 | A/A      | C/C | C/C | T/T | G/G | G/G | C/C | G/G | C/C | A/A | C/C | A/A | G/G | G/G | C/C |       |
|                 | C/C      | G/G | C/C | C/C | A/A | C/C | C/C | C/C | G/G | G/G | G/G | C/C | T/T | T/T | A/A |       |
| 9               | G/G      | C/C | G/G | T/T | C/C | T/T | G/G | G/G | A/A | C/C | G/A | T/T | G/G | G/G | C/C | 1     |
|                 | A/A      | C/T | T/T | C/T | G/C | T/T | C/C | A/A | G/C | G/G | G/G | T/T | C/C | C/C | A/A |       |
|                 | G/G      | C/C | C/C | G/A | G/G | A/A | G/G | G/G | G/A | C/C | C/C | G/G | G/G | A/A | C/C |       |
|                 | T/T      | T/T | A/A | A/A | A/A |     |     |     |     |     |     |     |     |     |     |       |
|                 | A/A      | T/C | C/C | T/T | G/G | G/T | C/C | G/G | C/C | A/A | C/C | A/A | G/G | G/G | C/C |       |











**Table S4.** Comparison of alleles predicted by MaCH and confirmed by allele-specific PCR

| Allele number | GenBank number | Allele (confirmed haplotype)                                          | Frequency Predicted by MaCH | Frequency Confirmed by sequencing |
|---------------|----------------|-----------------------------------------------------------------------|-----------------------------|-----------------------------------|
| 1             | KX265235       | ATTGGCACCAGGCCGCGCCCTGCTTAAGCCCTGGCGTGGTACTCGTCACGGTCCGCGGGGCGGATTAAA | 7                           | 8                                 |
| 2             | KX265236       | -C----G-----A--G---T--T--A-A---C-T-TC--G-----A-A-----                 | 11                          | 12                                |
| 3             | KX265189       | -----G-----TTG--G--G--T-----G-A-----A-----                            | 7                           | 7                                 |
| 4             | KX265190       | G----G--A-----TTG--G--G--T-----T-C-----G                              | 5                           | 5                                 |
| 5             | KX265191       | -C----G-----G-----T-----CT--G-A-----A-----                            | 4                           | 5                                 |
| 6             | KX265192       | -C----G-----A--G-----TG--A-A---C--TC--G-----A-A-----                  | 3                           | 4                                 |
| 7             | KX265193       | -----G-----A-----C-----G---C-GG-                                      | 3                           | 3                                 |
| 8             | KX265194       | -----G-----G-----T-----                                               | 3                           | 3                                 |
| 9             | KX265195       | -C----G-----A--G---GT--T--A-A---C-T-TC--G-----A-A-----                | 3                           | 3                                 |
| 10            | KX265196       | -C----G-----A--G---GT--T--A-A---T-TC--G-----A-A-----                  | 3                           | 3                                 |
| 11            | KX265197       | -C----G-----A--G---T--T--A-A---C-T-TC--G-A-----A-----                 | 3                           | 3                                 |
| 12            | KX265198       | -----G-----                                                           | 2                           | 2                                 |
| 13            | KX265199       | -----TTC-----                                                         | 2                           | 2                                 |
| 14            | KX265200       | -----A-----                                                           | 1                           | 2                                 |
| 15            | KX265201       | -C----G-----A--G-----T--A-A---C-T-TC--G-----A-A-----                  | 1                           | 2                                 |
| 16            | KX265202       | -C----G-----A--G-----T--A---C--T--G-A-----A-----                      | 2                           | 2                                 |
| 17            | KX265203       | -C----G-----A--G---T--T--A-A---C-T-TC-----                            | 2                           | 2                                 |
| 18            | KX265204       | G----G--A-----TTG--G--G--T-----                                       | 2                           | 2                                 |
| 19            | KX265205       | -C----G-----G-----T-----                                              | 1                           | 1                                 |
| 20            | KX265206       | -----A-----                                                           | 1                           | 1                                 |
| 21            | KX265207       | -----A-----T-C-----A-----G                                            | 1                           | 1                                 |
| 22            | KX265208       | -----G-----G-----T-----A-GT-----G-----A-A-----                        | 1                           | 1                                 |
| 23            | KX265209       | -----G-----G-----T-----A-GT-----TTC-----                              | 1                           | 1                                 |
| 24            | KX265210       | G----G--A-----TTGAAG-----T-----A-----A-----                           | 0                           | 1                                 |
| 25            | KX265211       | -----GT-----A--G-----T-C-A-A-A--GT-T-----                             | 1                           | 1                                 |
| 26            | KX265212       | -CC---G---G---AT--G---T--T--ATA-----T-TC-----                         | 0                           | 1                                 |
| 27            | KX265213       | -----TG-----TC--A--G---T--T-----T-T---G-----A-AA-----                 | 0                           | 1                                 |
| 28            | KX265214       | -----G-----A--G---G---T-C-A-A---GT-T--T-C-----G                       | 1                           | 1                                 |
| 29            | KX265215       | -----G-----A--G---G---T-C-A-A-A--GT-T--G-----A-A-----                 | 1                           | 1                                 |
| 30            | KX265216       | -----G--G-----A--G-----T-C-A-A-A--GT-T--TGC-----G                     | 0                           | 1                                 |
| 31            | KX265217       | -----G-----A--A-----                                                  | 1                           | 1                                 |
| 32            | KX265218       | --C---G---G--T-AT--G---T-----A-----CTC--G-A---G-A--G--A-----          | 0                           | 1                                 |
| 33            | KX265219       | -----G-----G-----G-A-----A-----                                       | 1                           | 1                                 |
| 34            | KX265220       | G----G--AA-----TTG--G--G--T--A---C-----T--TT-C---A-A-----G            | 1                           | 1                                 |
| 35            | KX265221       | -----G-----A--G-----T-----GT-T-----G-C---                             | 1                           | 1                                 |
| 36            | KX265222       | G----G--A-----TTG--G--G--TT-----                                      | 1                           | 1                                 |
| 37            | KX265223       | G----G--A-----TTG--G--G--T-----G-----A-A-----                         | 1                           | 1                                 |
| 38            | KX265224       | G----G--AA-----TTG--G--G--T--A---C-----T--TT-C---A-A-----G            | 1                           | 1                                 |
| 39            | KX265225       | ---T-G-----TG--G--TG--T-----C-----                                    | 1                           | 1                                 |
| 40            | KX265226       | ---A-----T-----C--G-A-----A-----                                      | 0                           | 1                                 |
| 41            | KX265227       | -C----G-----A--G-----T--A-A---CT-----A-----G----                      | 1                           | 1                                 |
| 42            | KX265228       | -C----G-----G-----T-----CT--G-----G----                               | 1                           | 1                                 |
| 43            | KX265229       | -----T-----G-----A-A-----                                             | 1                           | 1                                 |
| 44            | KX265230       | -----G-----T--TG--G--G--T-----C-----T-----                            | 1                           | 1                                 |
| 45            | KX265231       | -----G-----G-----T-----T-----                                         | 1                           | 1                                 |
| 46            | KX265232       | -----G--A-----TTG--G--T-----G-A-----A-----                            | 1                           | 1                                 |
| 47            | KX265233       | -C----G-----A--G---G---T--A-A---C-T-TC--G-----A-A-----                | 1                           | 1                                 |
| 48            | KX265234       | -C----G-----A--G---T--T--A-A---C-T-TC--G-----AA-A-----                | 1                           | 1                                 |
| 49            | NA             | -----G-----T-----                                                     | 1                           | 0                                 |
| 50            | NA             | -----T-----G-----A-A-----                                             | 1                           | 0                                 |
| 51            | NA             | -----A-----T-C-----A-----G                                            | 1                           | 0                                 |
| 52            | NA             | G----G--A-----TTGAA-----A-----A-----                                  | 1                           | 0                                 |
| 53            | NA             | -----G-----G-----T-----T-T---G-A-----A-----                           | 1                           | 0                                 |
| 54            | NA             | -CC---G---G---AT--G---T--T--A---CTC--G-A---G-A--G-----                | 1                           | 0                                 |
| 55            | NA             | -C----G-----TC--A--G---T--T-----T-----G-----A-AA-----                 | 1                           | 0                                 |
| 56            | NA             | -----G--G-----A--G-----T-C-A-A-A--GT-T--G-----A-----                  | 1                           | 0                                 |
| 57            | NA             | -----G-----T-A--G-----TG--A-A---C--TC--G-----A-A---A-----             | 1                           | 0                                 |
| 58            | NA             | -C----G-----A--G---T--A-A---T-TC-----                                 | 1                           | 0                                 |
| 59            | NA             | -CC---G---G---AT--G---T--T--ATA---C-T-TC--G-----A-A-----              | 1                           | 0                                 |
| 60            | NA             | -C-A--G-----A--G---T--T--A-A---C-T-TCC--G-A-----AG---G-----           | 1                           | 0                                 |
|               |                | Total                                                                 | 100                         | 100                               |

NA- Not available
